# Supplementary material for: Disentangling the rhythms of human activity in the built environment for airborne transmission risk: An analysis of large-scale mobility data
Source: eLife journal article supplement (doi:10.7554/elife.80466), 2023-03-27
Supplement: supp [file elife-80466-supp-v1.zip]

Archive with 14 entries (14 files):
- elife_poa_e80466_Figure_1_figure_supplement_1.pdf
- elife_poa_e80466_Figure_1_figure_supplement_2.pdf
- elife_poa_e80466_Figure_1_figure_supplement_3.pdf
- elife_poa_e80466_Figure_1_figure_supplement_4.pdf
- elife_poa_e80466_Figure_2_figure_supplement_1.pdf
- elife_poa_e80466_Figure_2_figure_supplement_2.pdf
- elife_poa_e80466_Figure_2_figure_supplement_3.pdf
- elife_poa_e80466_Figure_2_figure_supplement_4.pdf
- elife_poa_e80466_Figure_2_figure_supplement_5.pdf
- elife_poa_e80466_Figure_3_figure_supplement_1.pdf
- elife_poa_e80466_Figure_3_figure_supplement_2.pdf
- elife_poa_e80466_Figure_4_figure_supplement_1.pdf
- elife_poa_e80466_Figure_4_figure_supplement_2.pdf
- elife_poa_e80466_Figure_4_figure_supplement_3.pdf
