# Supplementary material for: Disentangling the rhythms of human activity in the built environment for airborne transmission risk: An analysis of large-scale mobility data
Source: eLife journal article supplement (doi:10.7554/elife.80466), 2023-03-27
Supplement: supp [file elife-80466-supp-v1.zip › elife_poa_e80466_Figure_3_figure_supplement_1.pdf]

|                    | 2018/2019 | 2018/2020 | 2019/2020 |
|--------------------|-----------|-----------|-----------|
| Euclidean distance | 1.1       | 1.5       | 1.5       |

(a) Interannual deviations

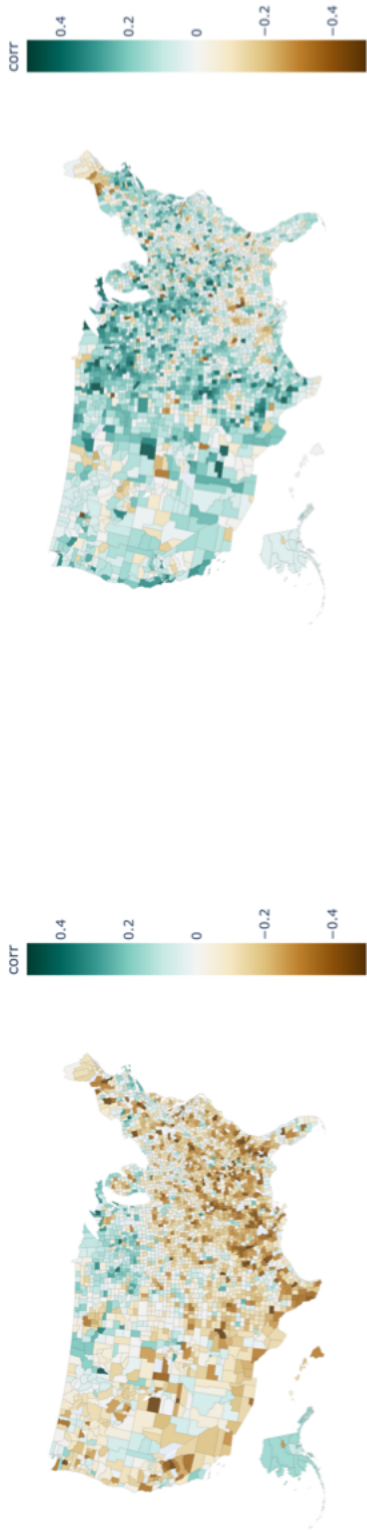

(b) Deviations during Spring 2020

(c) Deviations during Winter 2020
