# Supplementary figures and images for: Disentangling the rhythms of human activity in the built environment for airborne transmission risk: An analysis of large-scale mobility data
Source: eLife journal article supplement (doi:10.7554/elife.80466), 2023-03-27

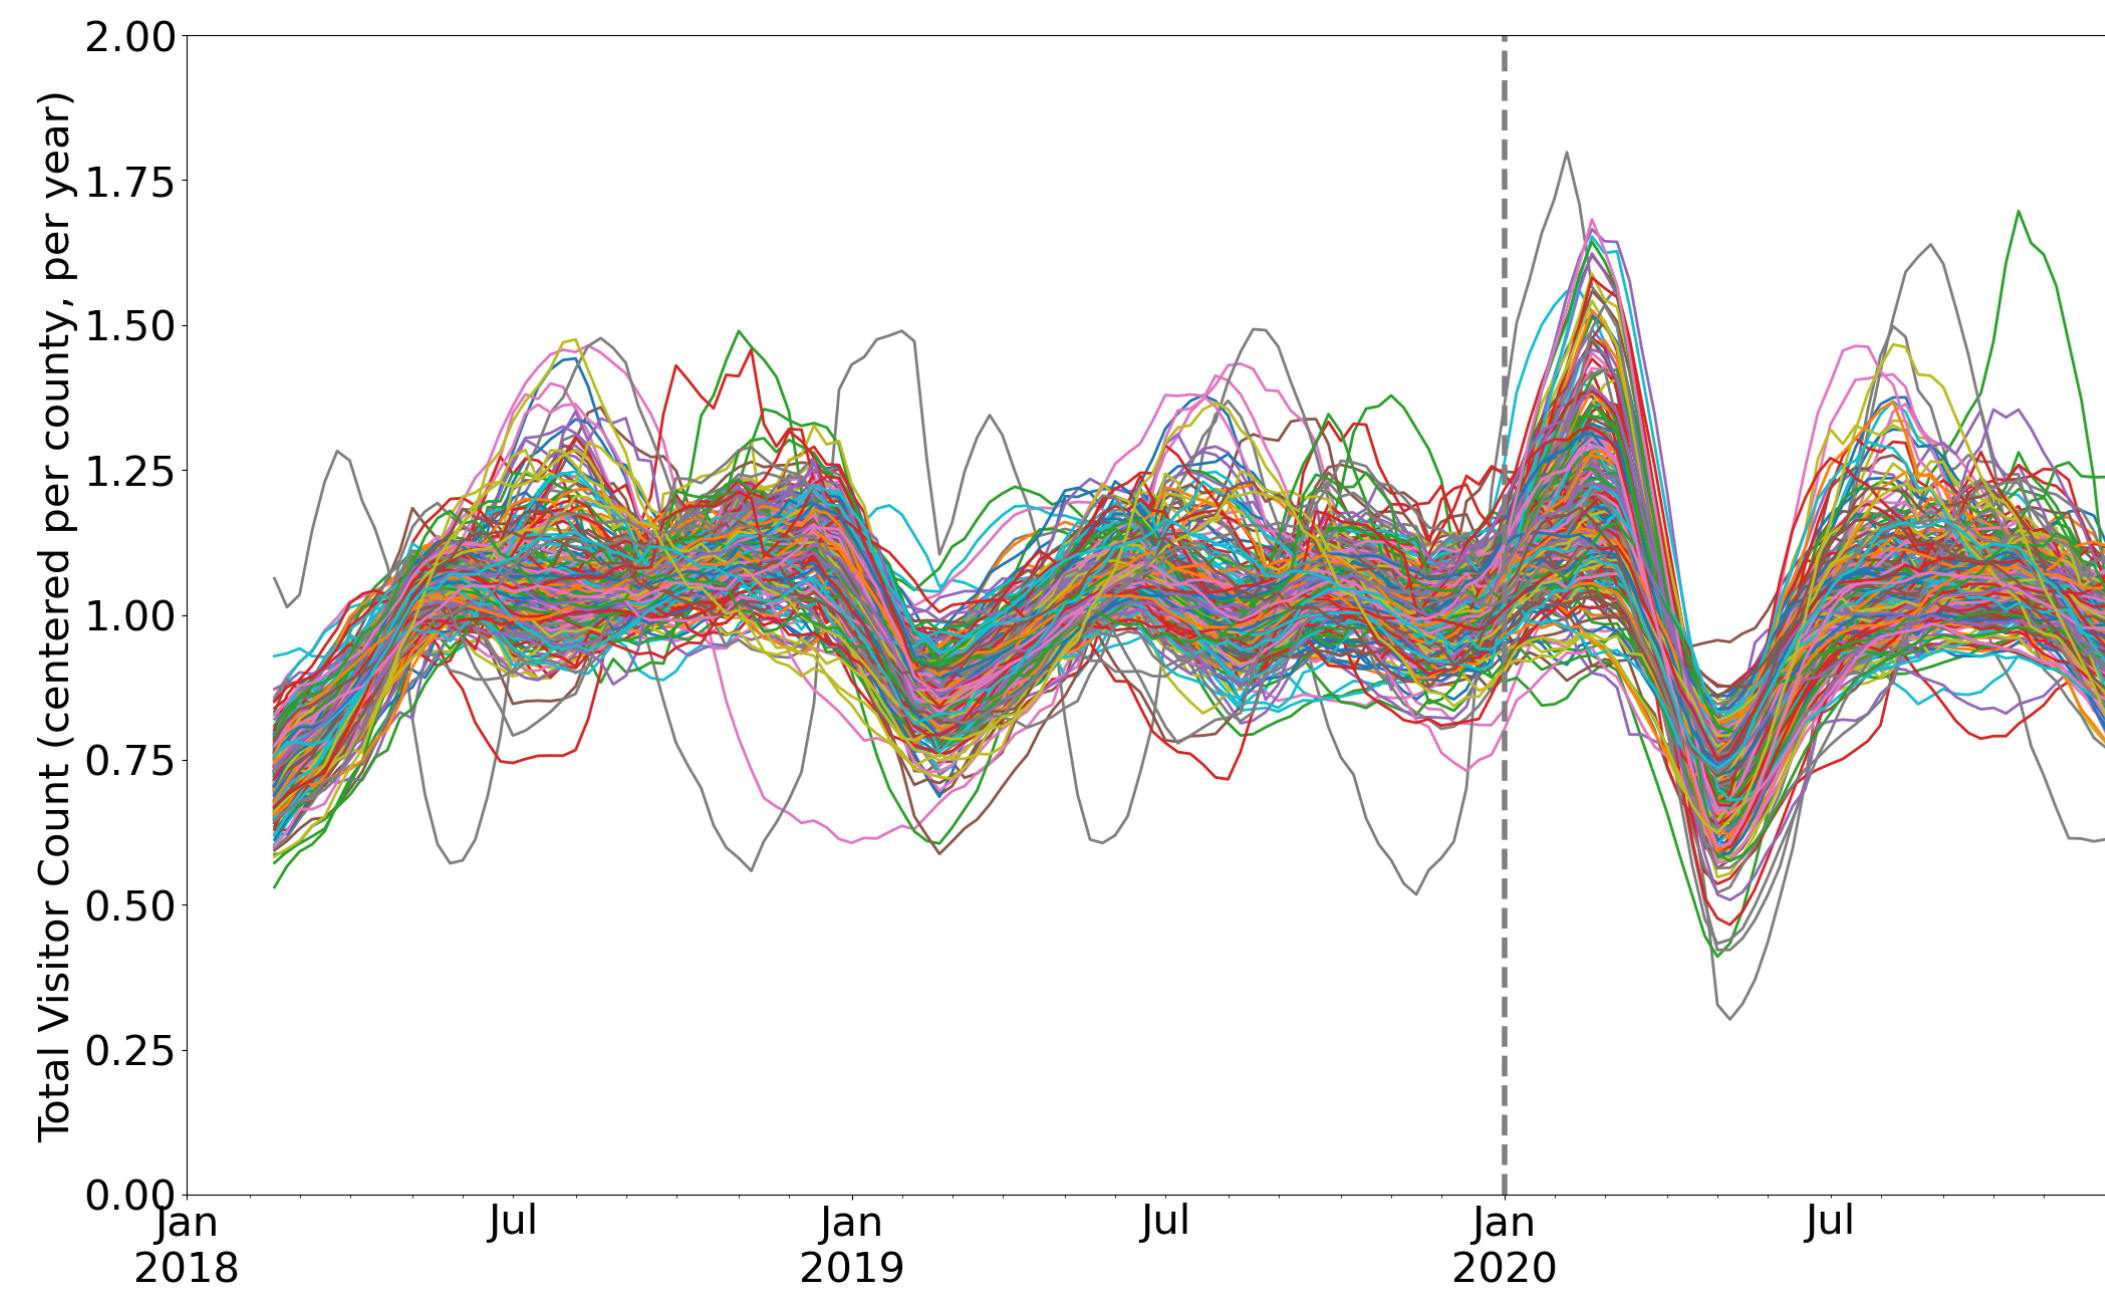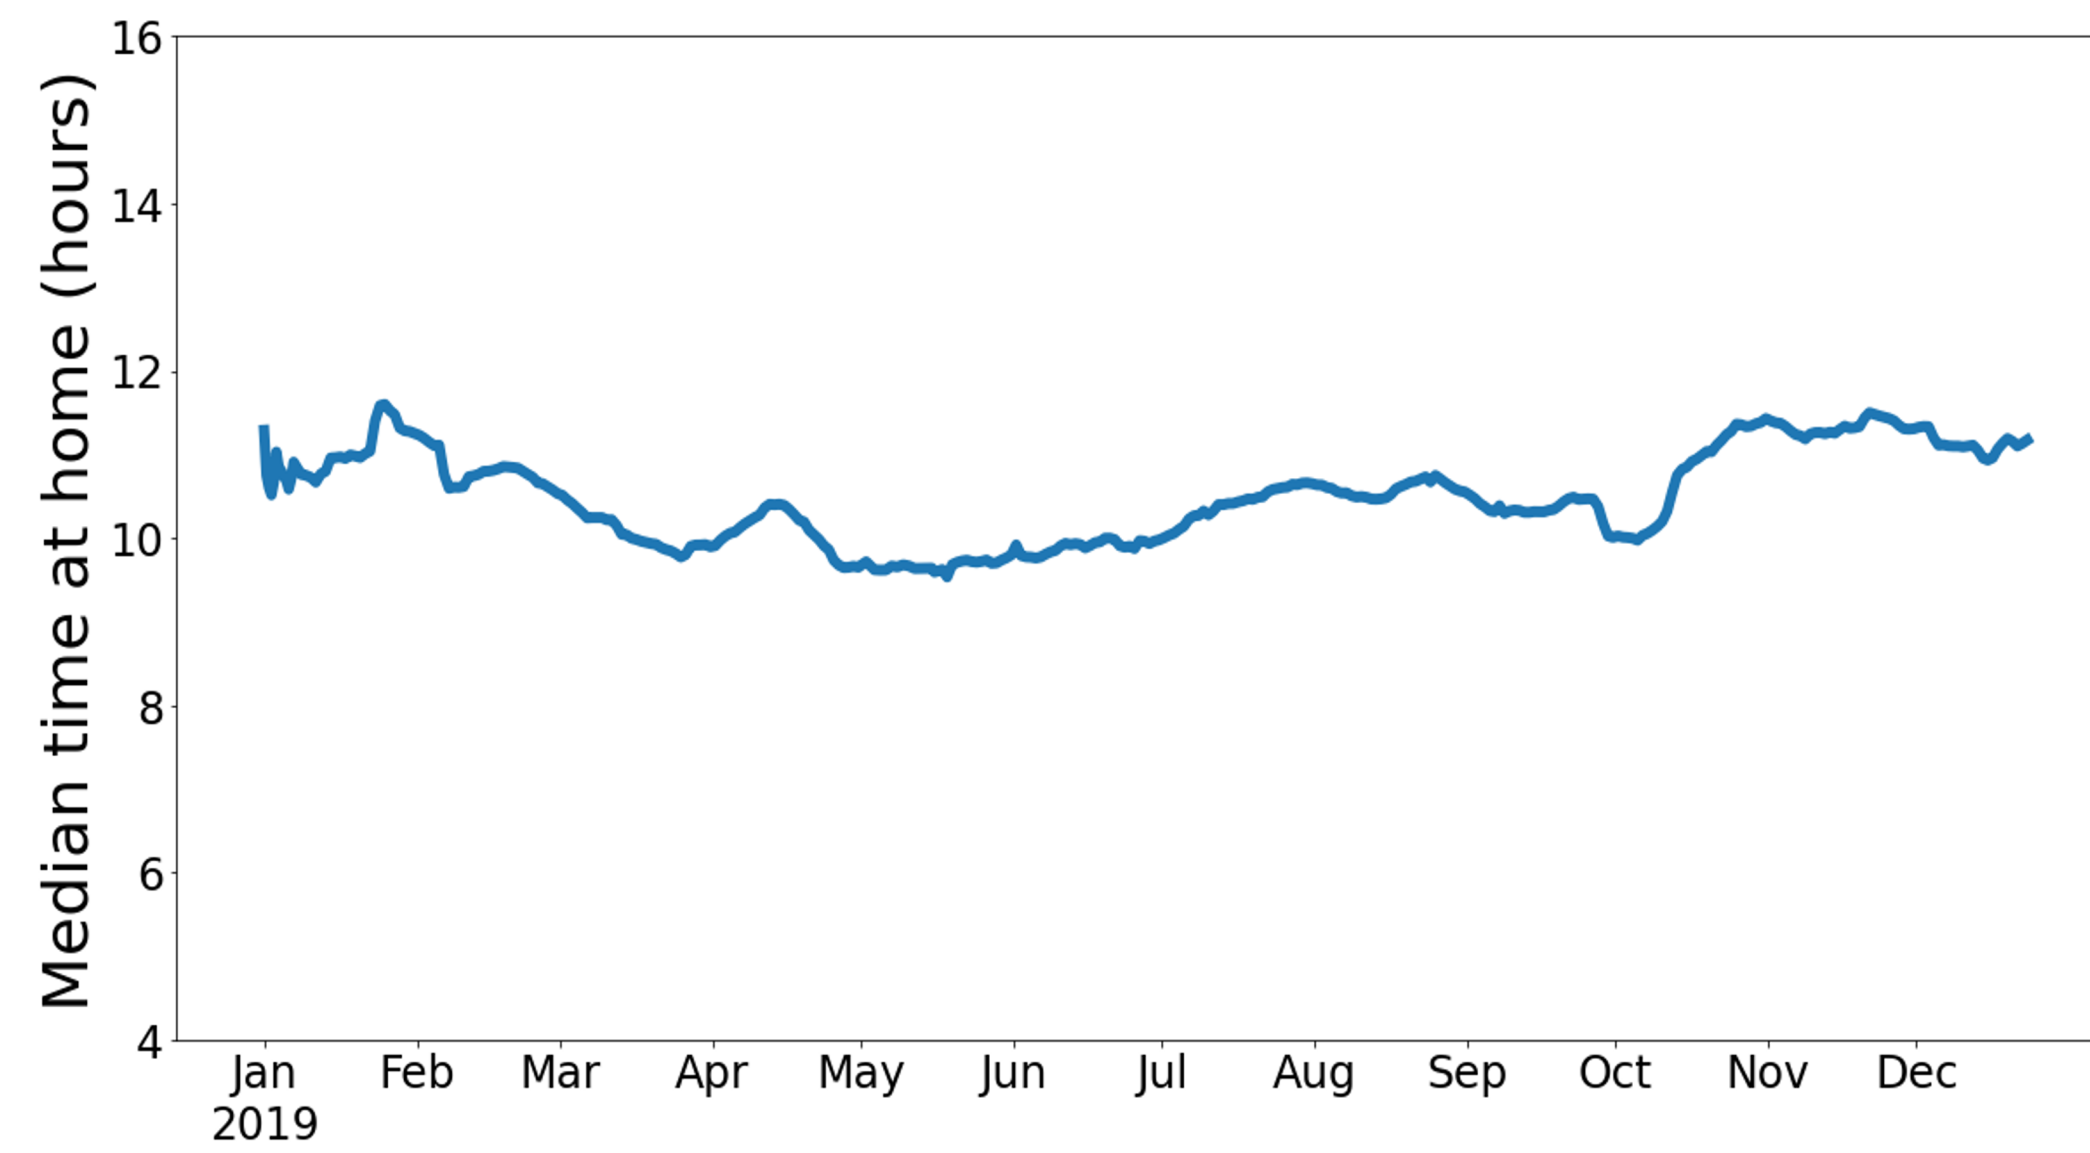

Supplement: supp [file elife-80466-supp-v1.zip › elife_poa_e80466_Figure_1_figure_supplement_1.pdf]

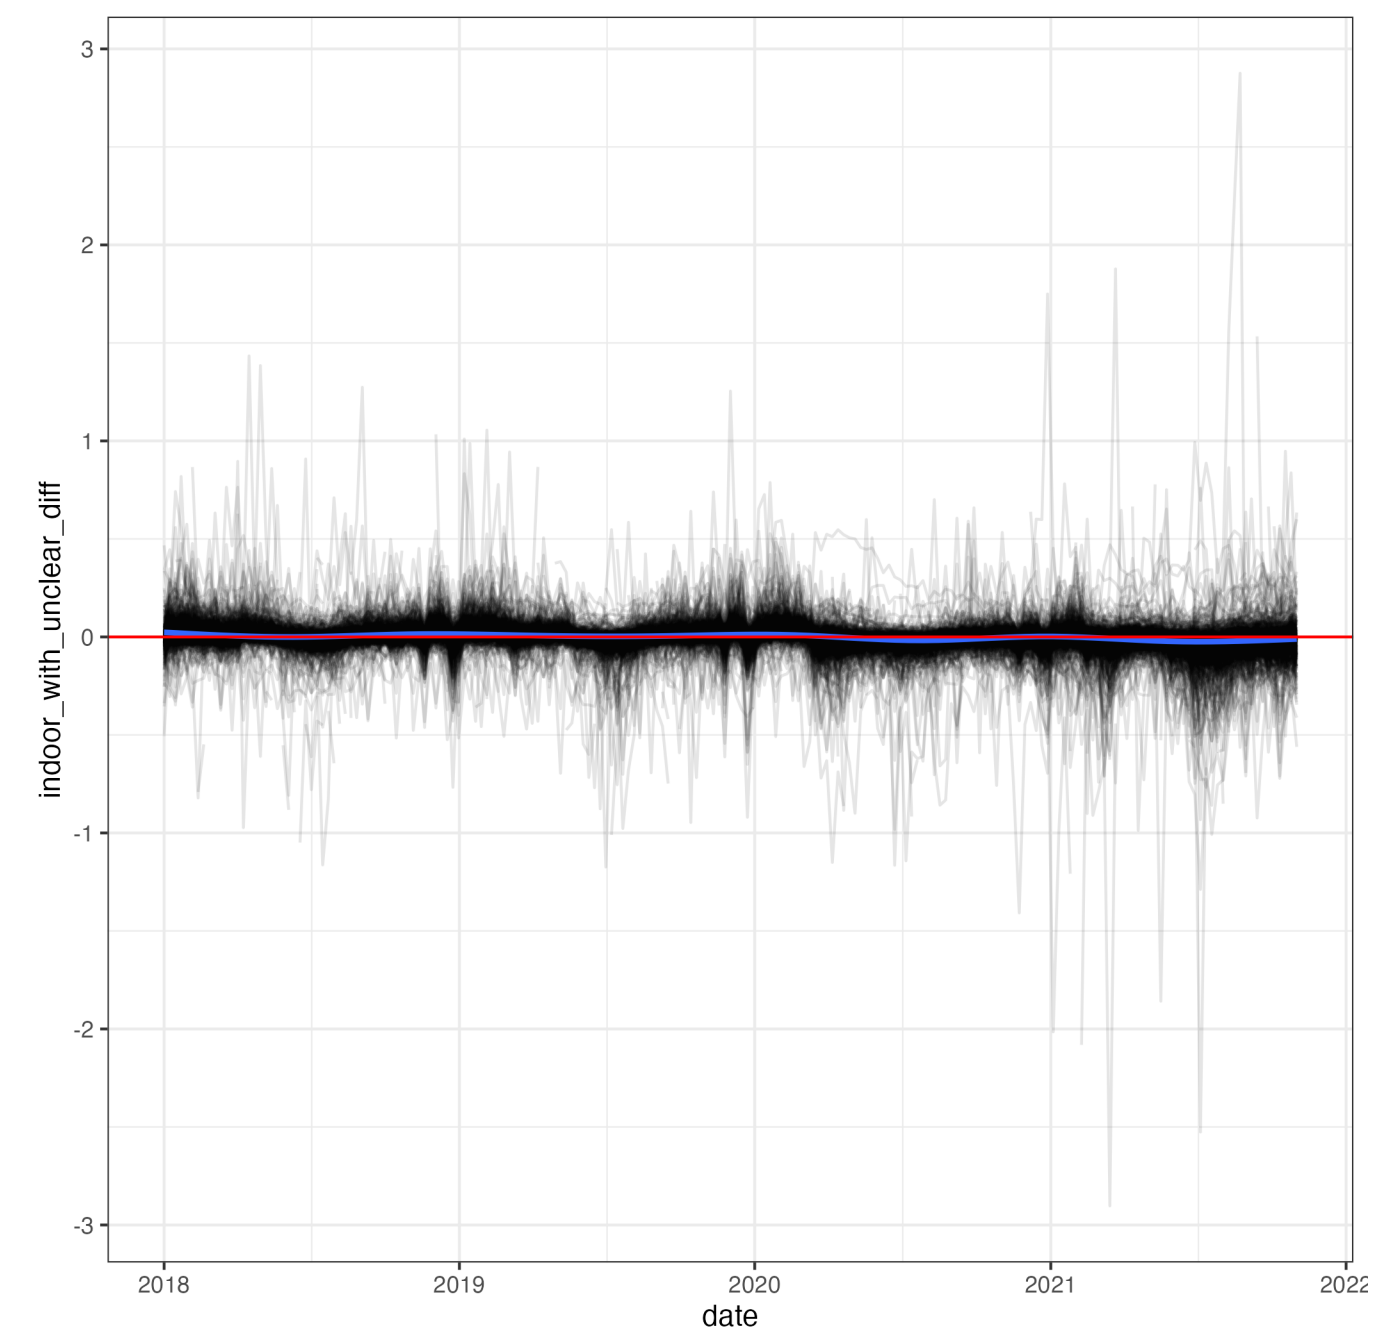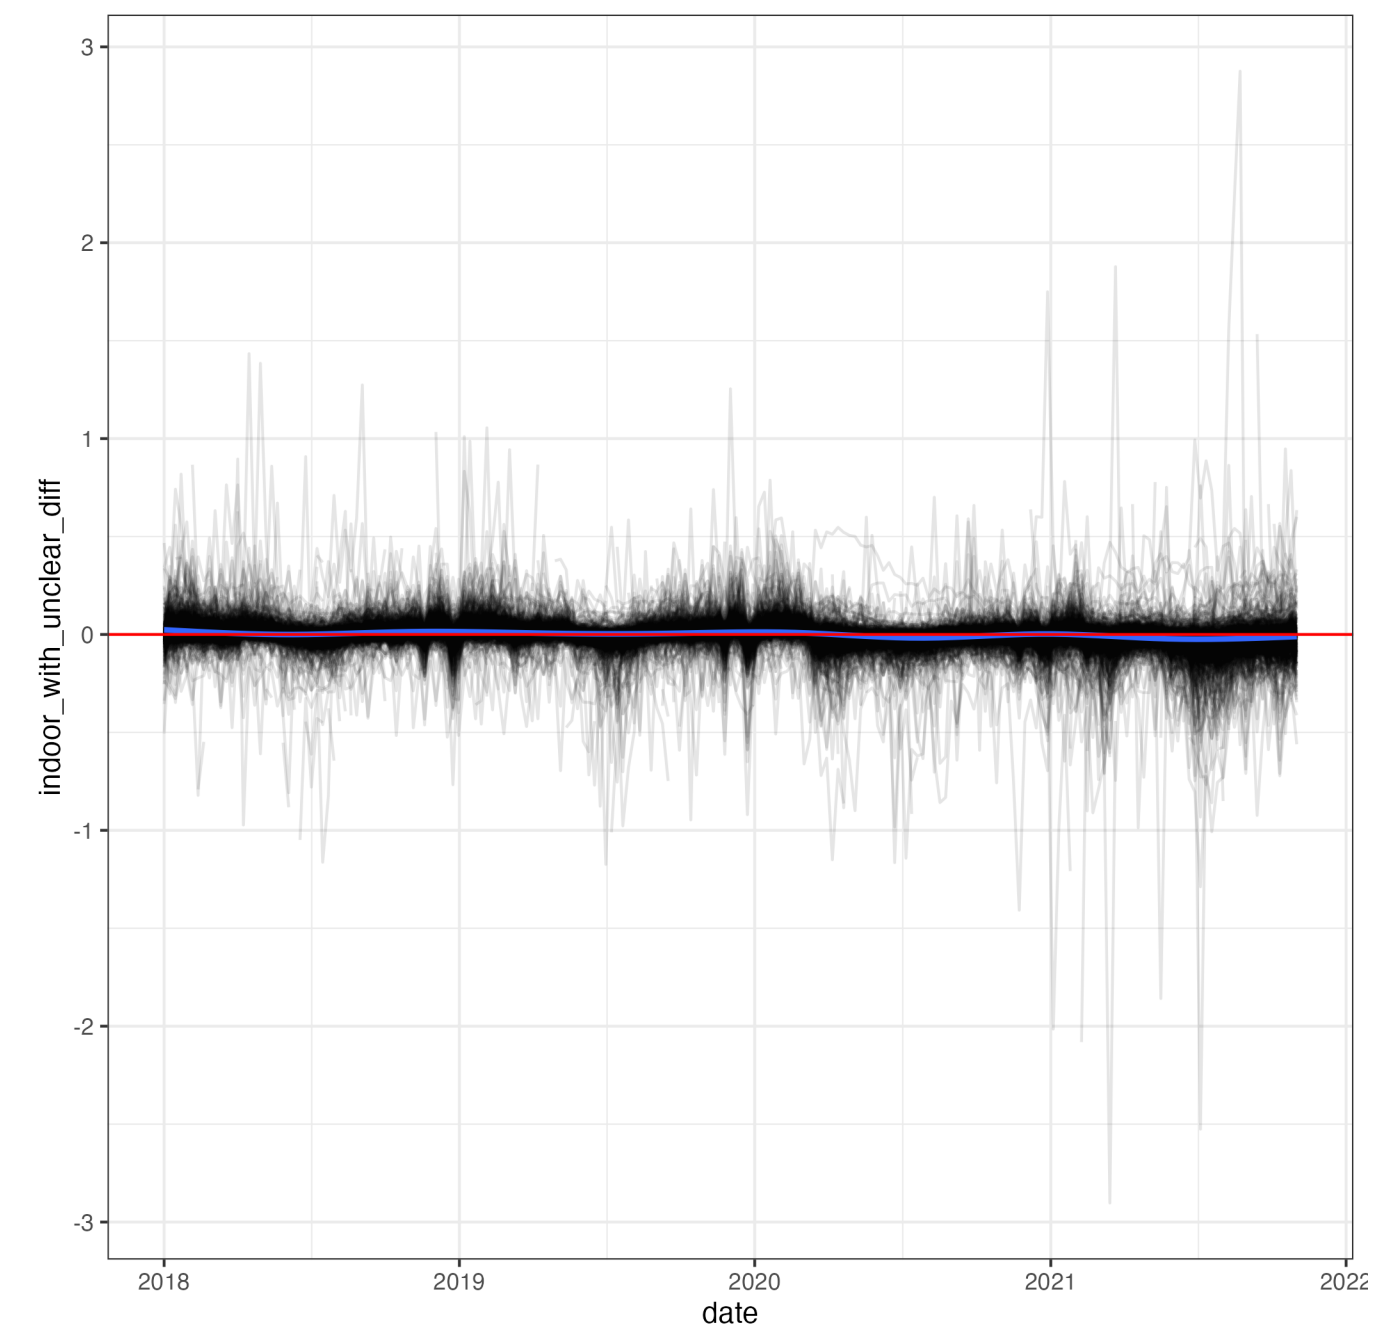

Supplement: supp [file elife-80466-supp-v1.zip › elife_poa_e80466_Figure_1_figure_supplement_2.pdf]

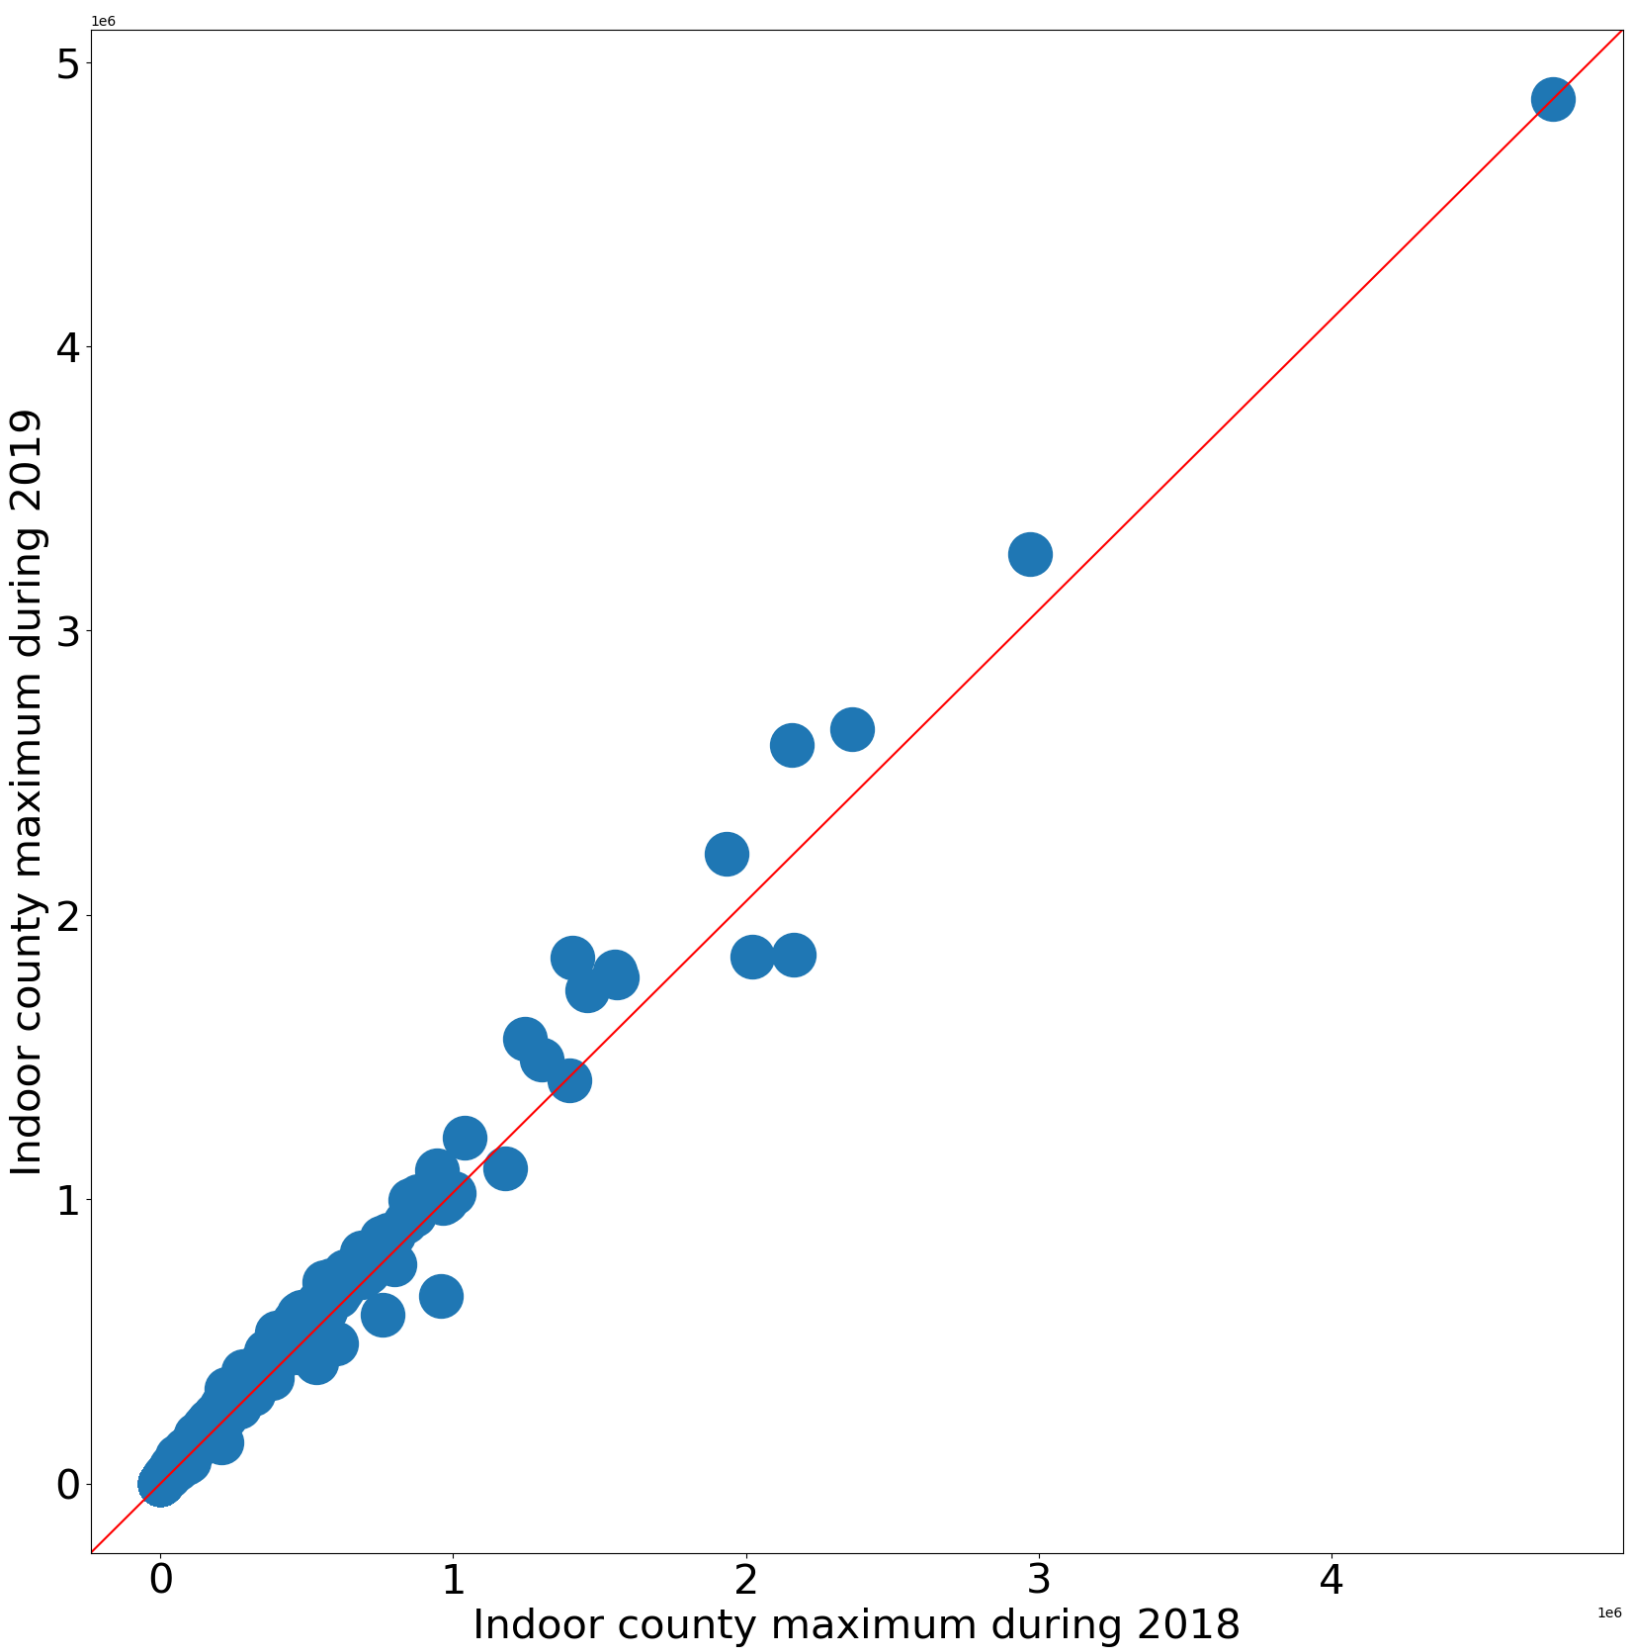

Supplement: supp [file elife-80466-supp-v1.zip › elife_poa_e80466_Figure_1_figure_supplement_3.pdf]

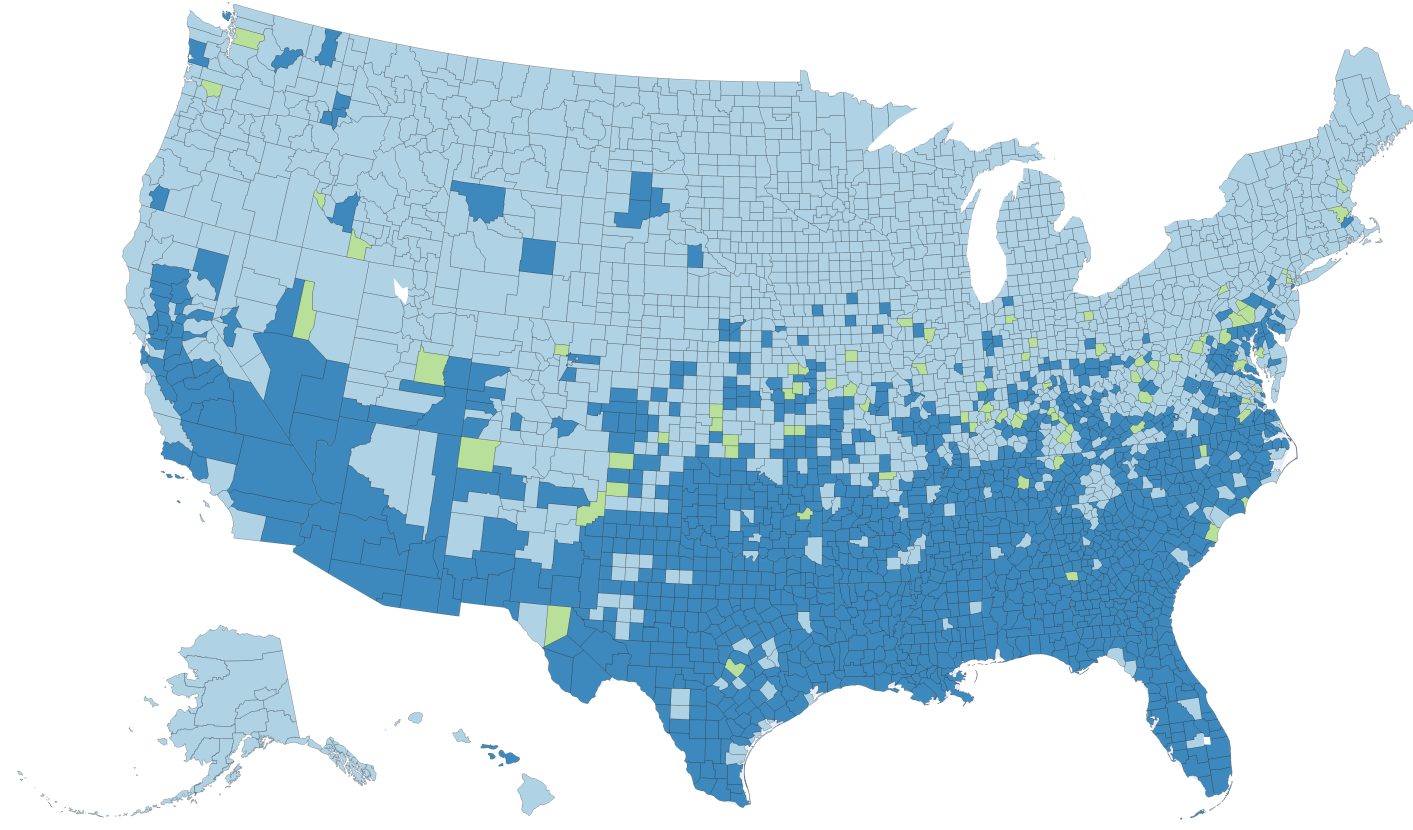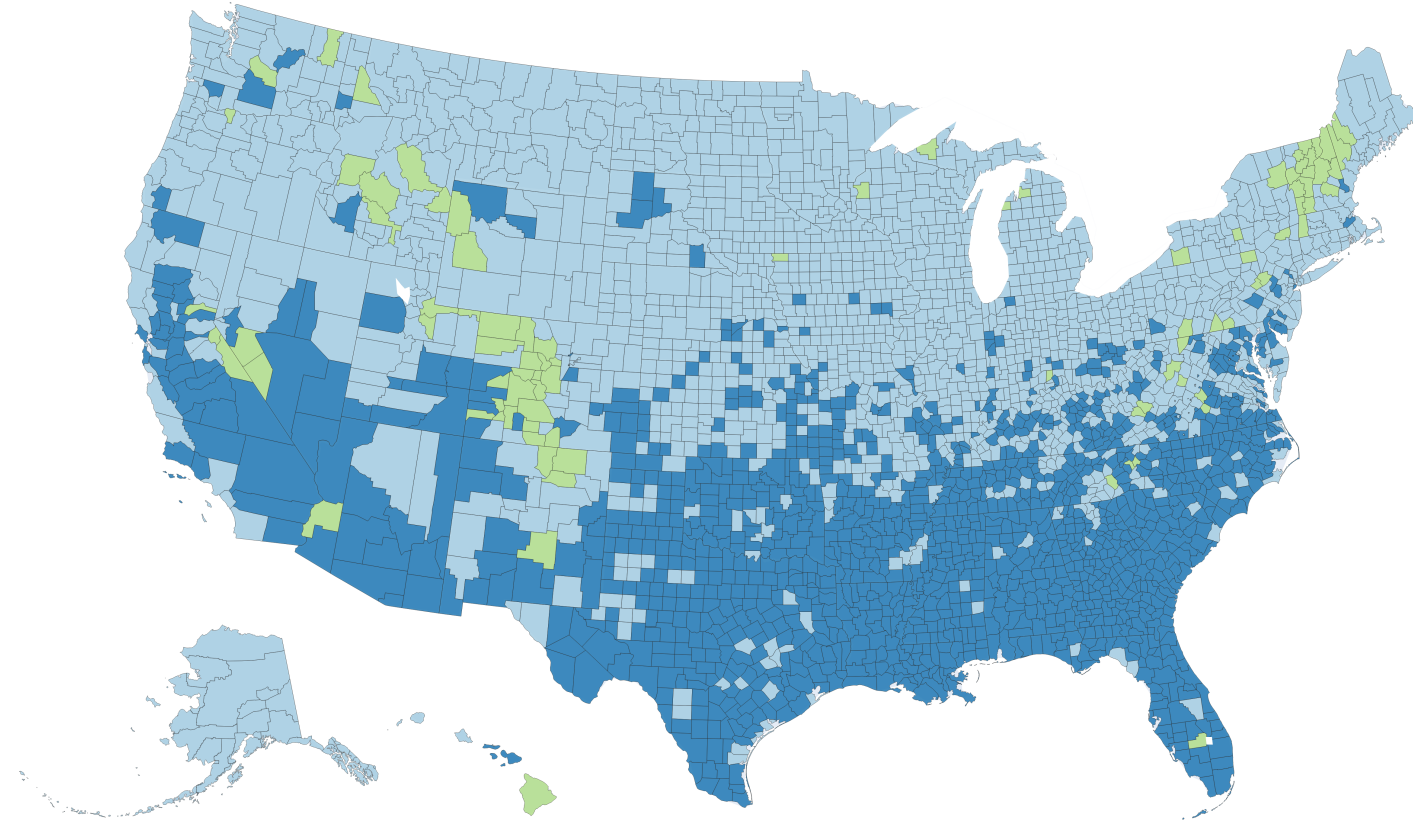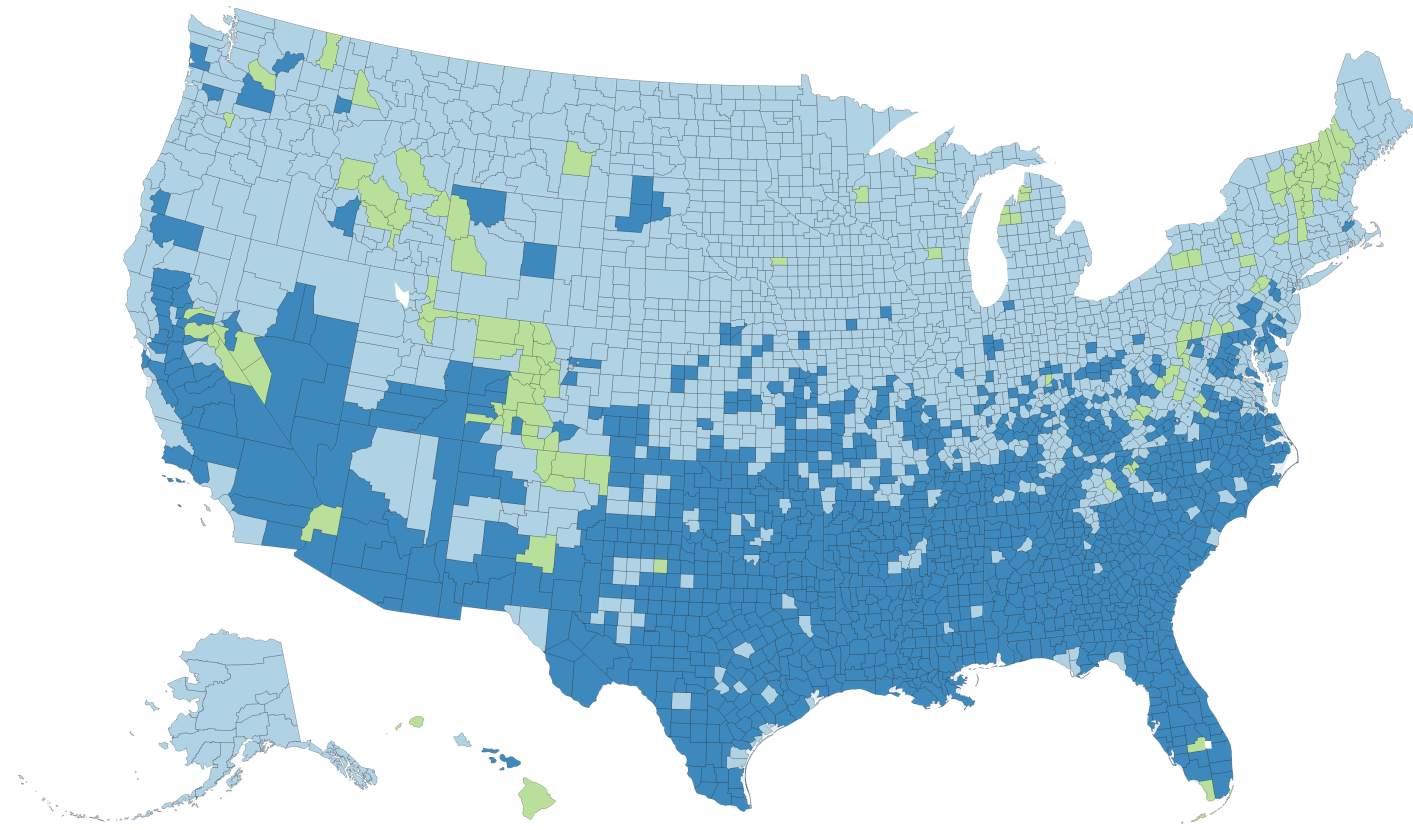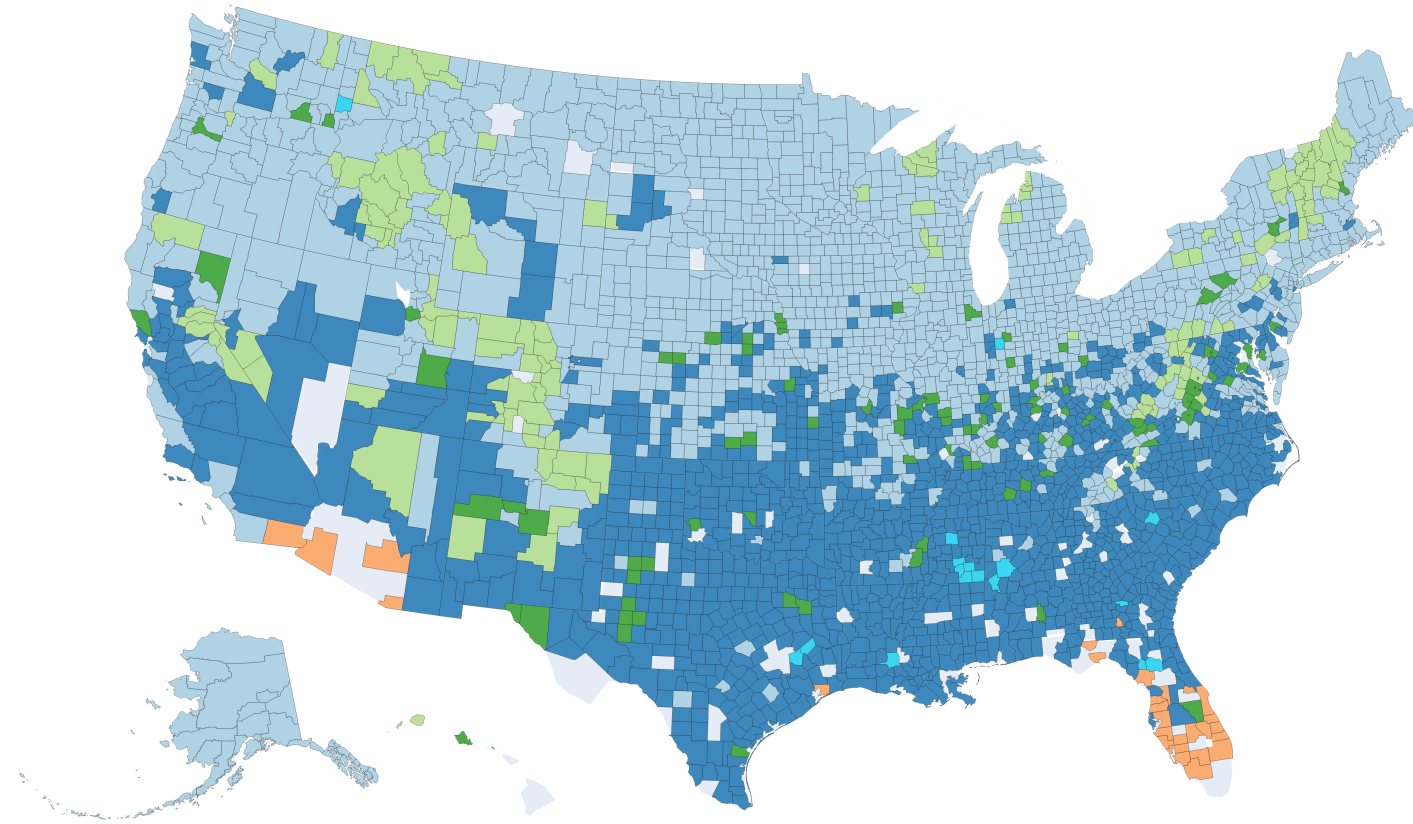

Supplement: supp [file elife-80466-supp-v1.zip › elife_poa_e80466_Figure_1_figure_supplement_4.pdf]

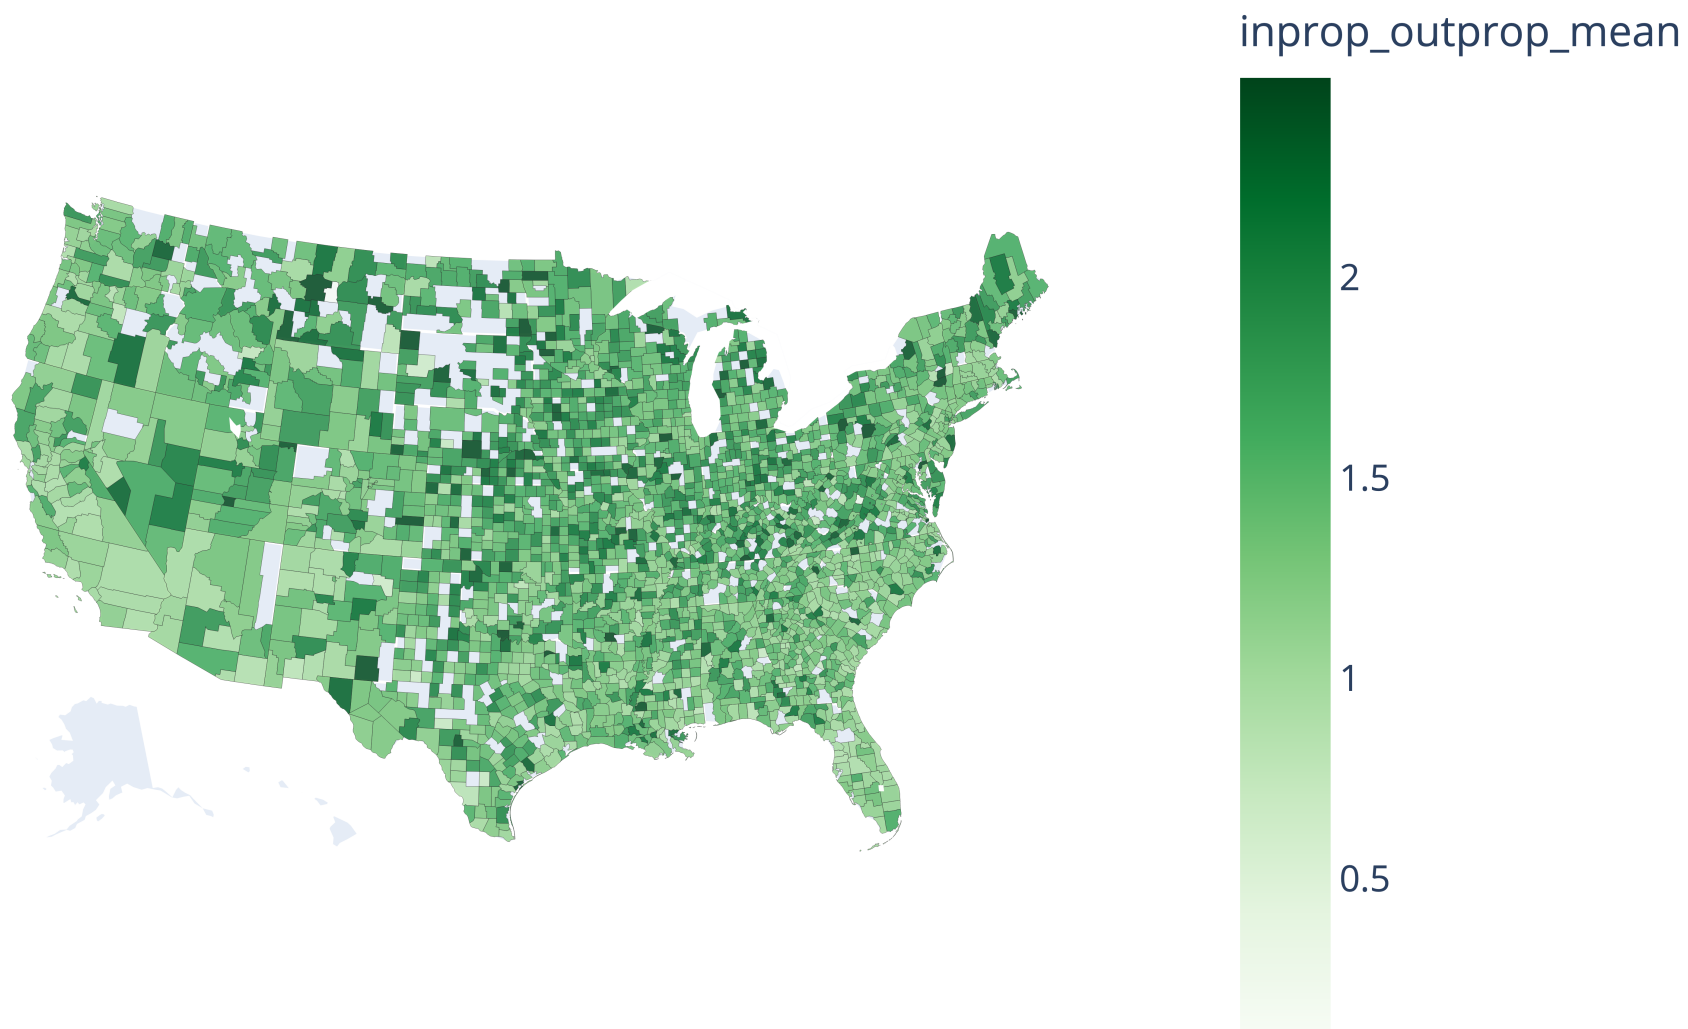

Supplement: supp [file elife-80466-supp-v1.zip › elife_poa_e80466_Figure_2_figure_supplement_1.pdf]

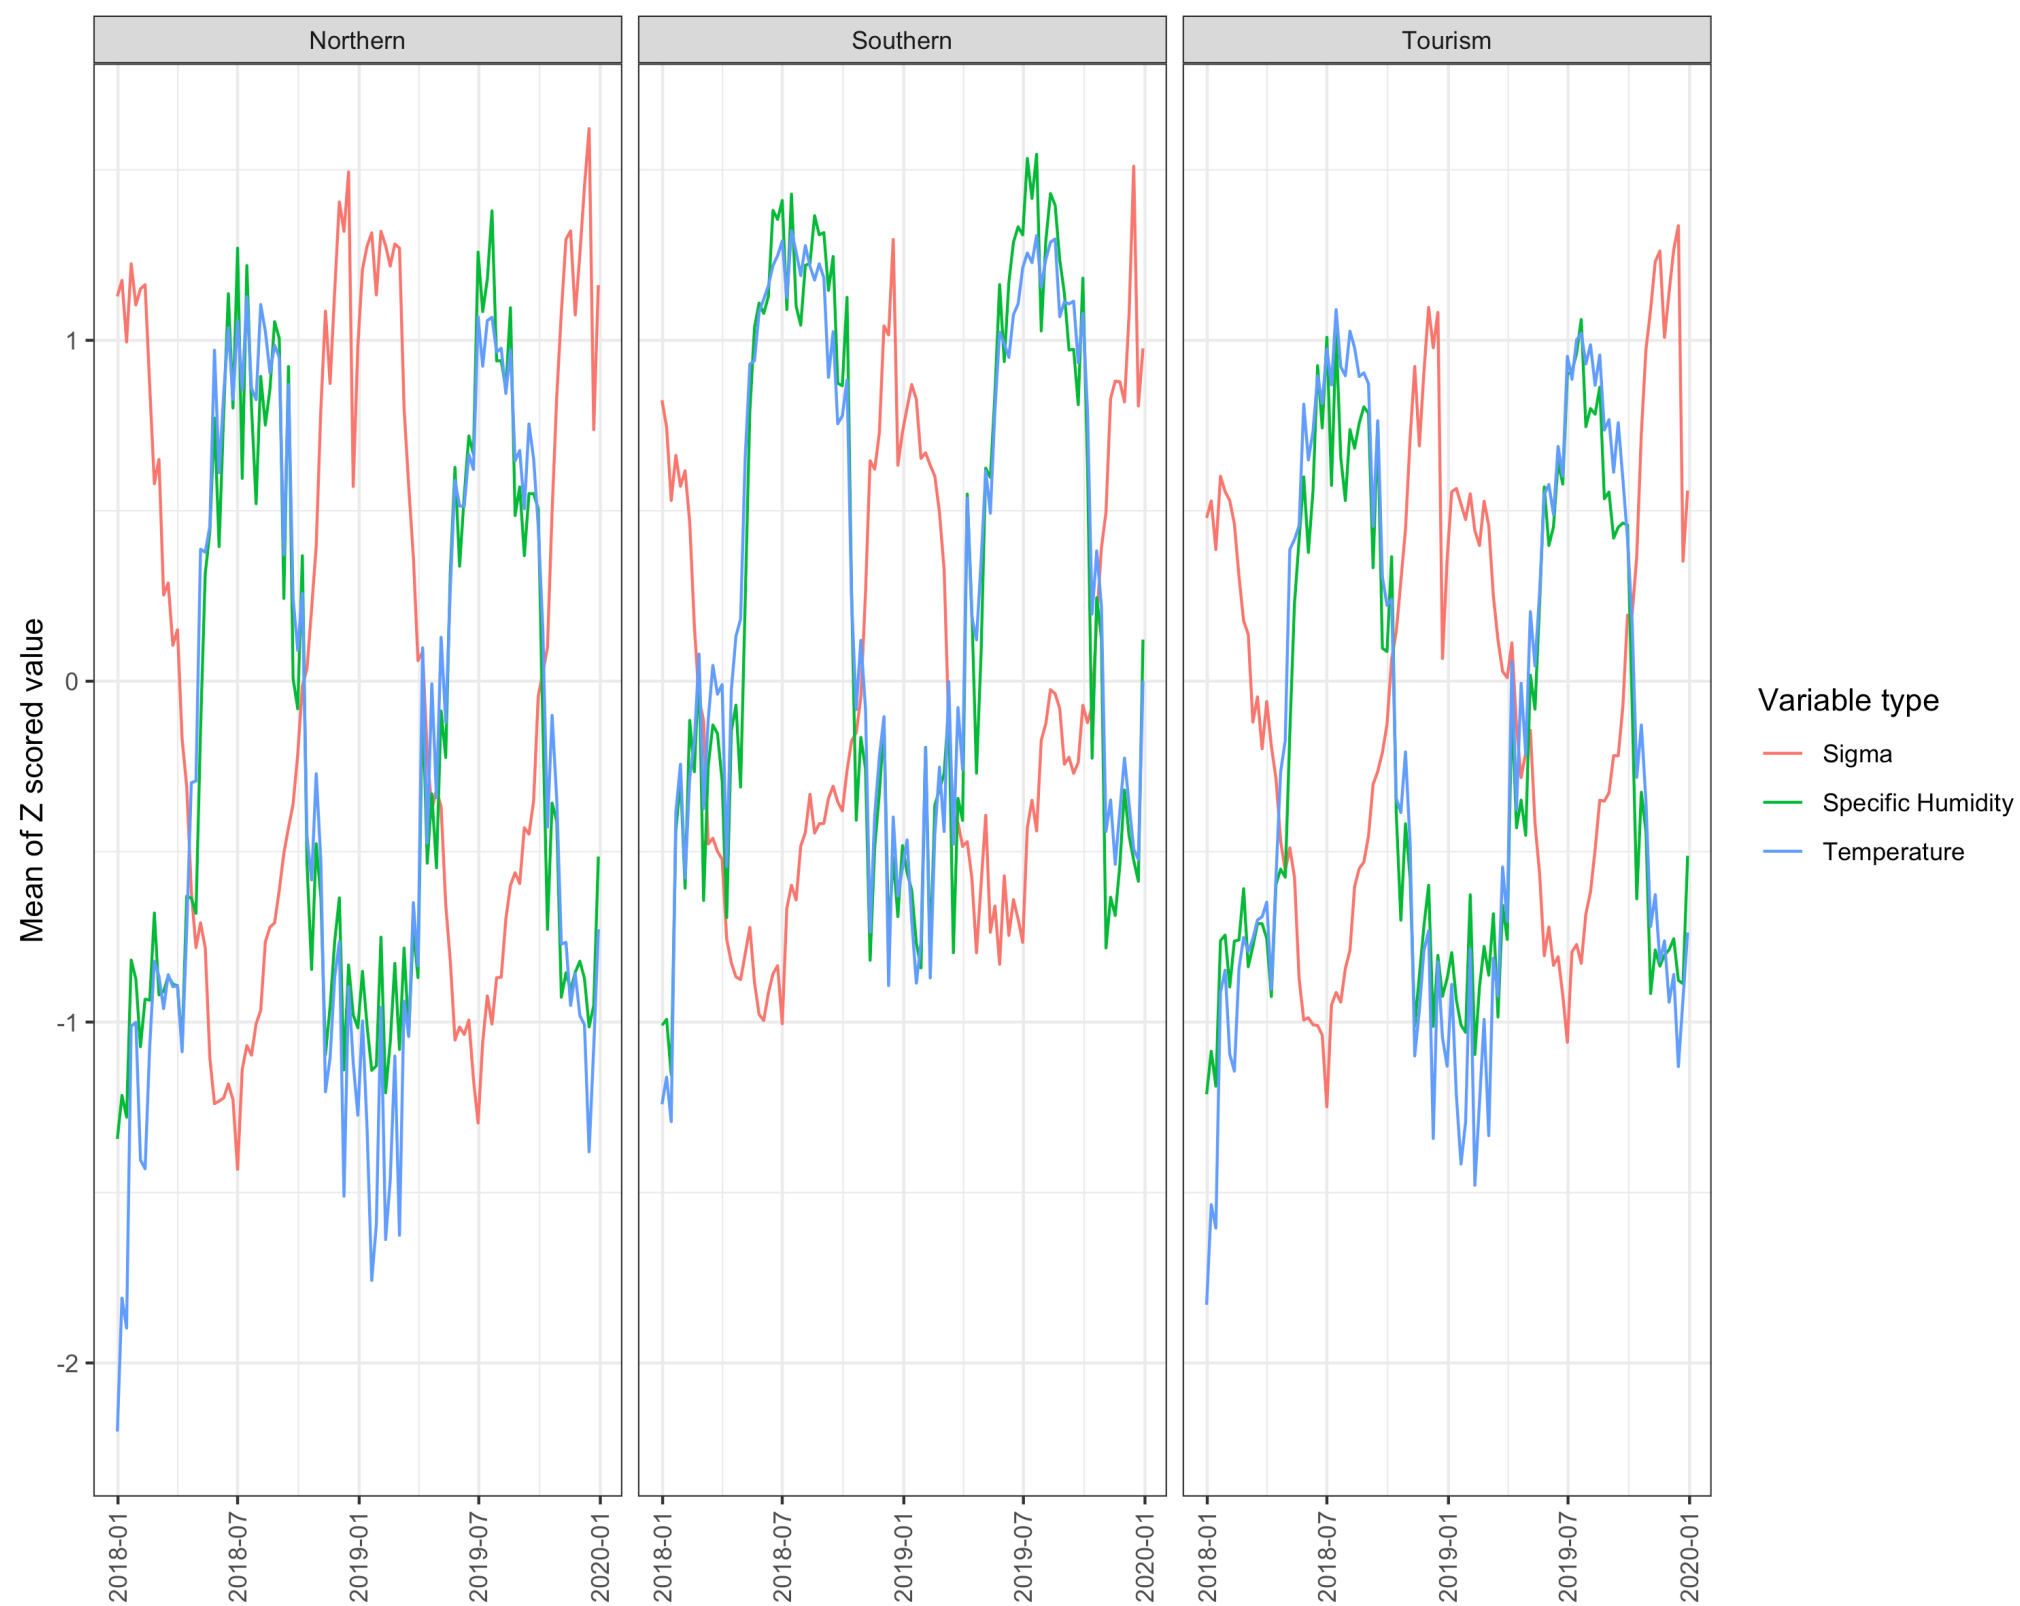

Supplement: supp [file elife-80466-supp-v1.zip › elife_poa_e80466_Figure_2_figure_supplement_2.pdf]

(A)

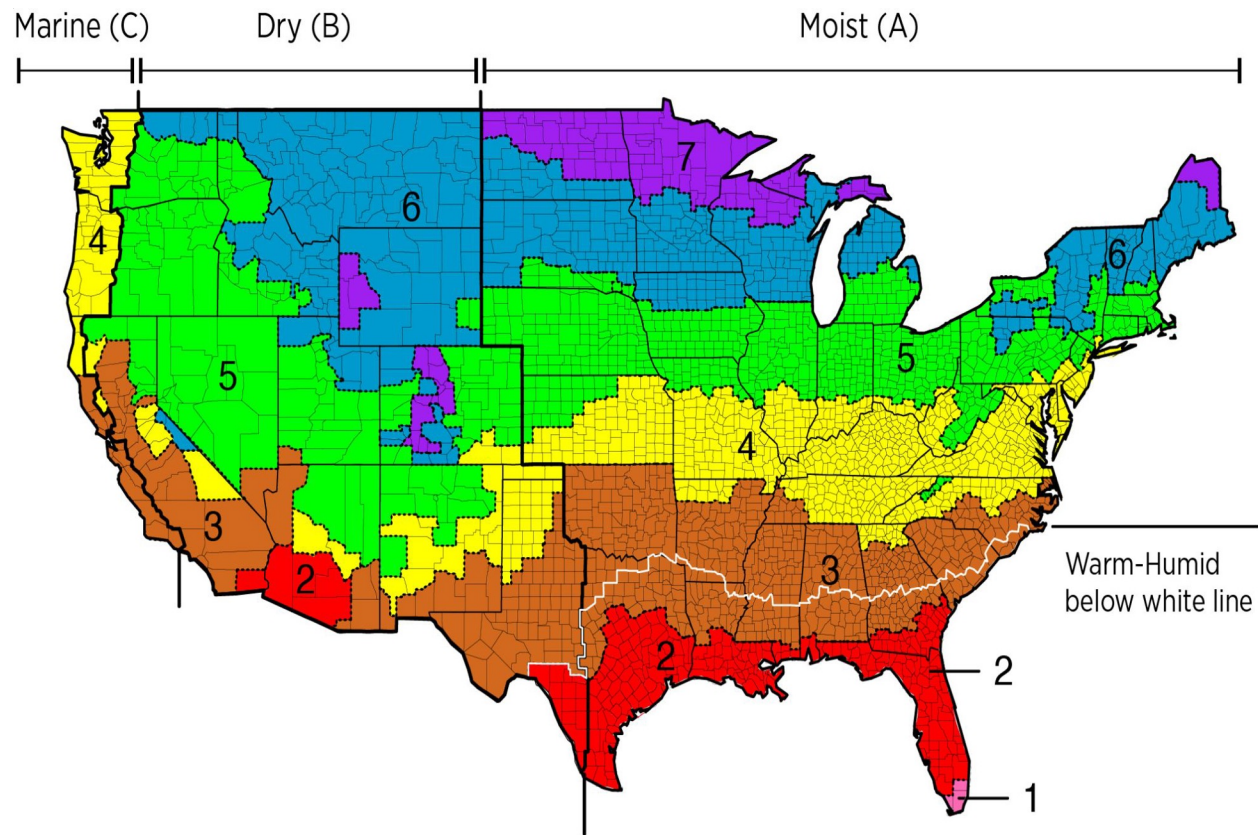

(B)

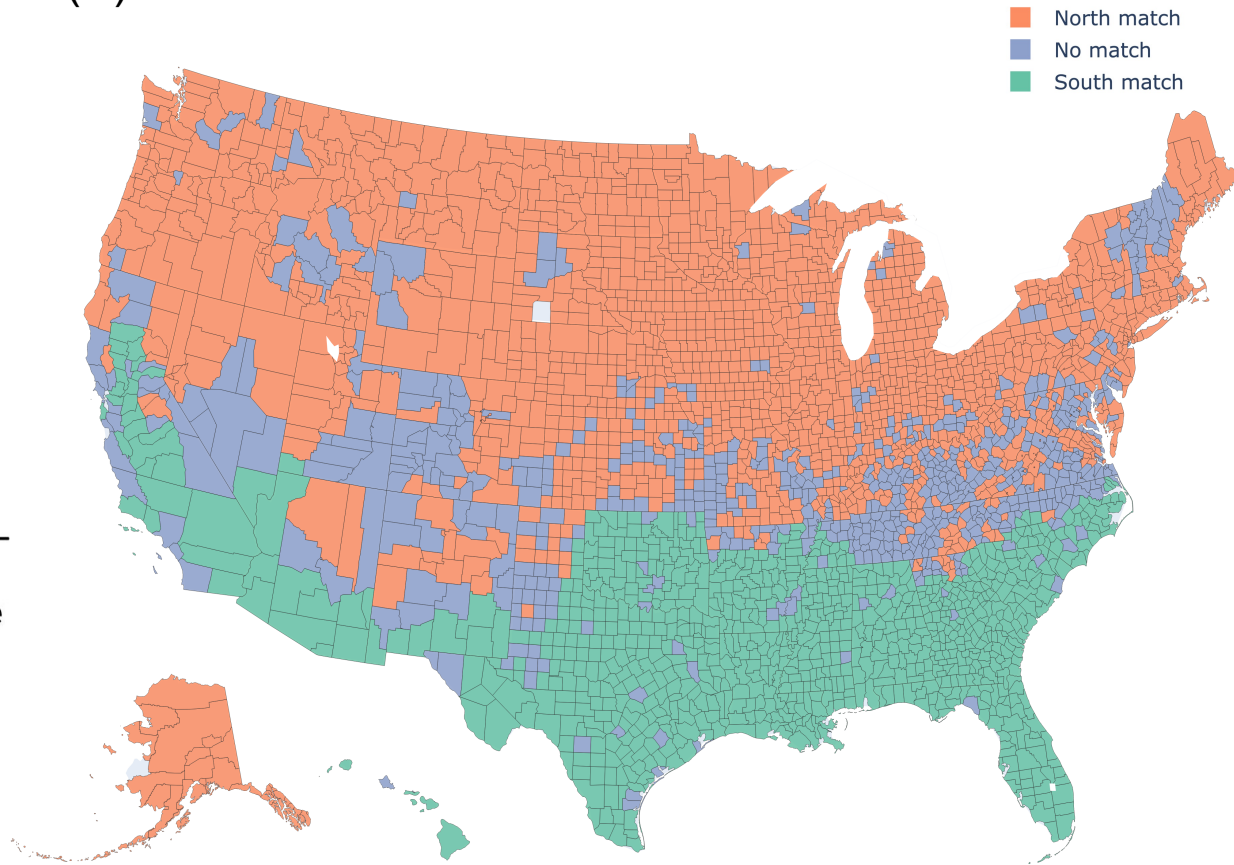

Supplement: supp [file elife-80466-supp-v1.zip › elife_poa_e80466_Figure_2_figure_supplement_3.pdf]

flag

- Ski area (but not in cluster)
- In cluster (but not ski area)
- Ski area and in cluster

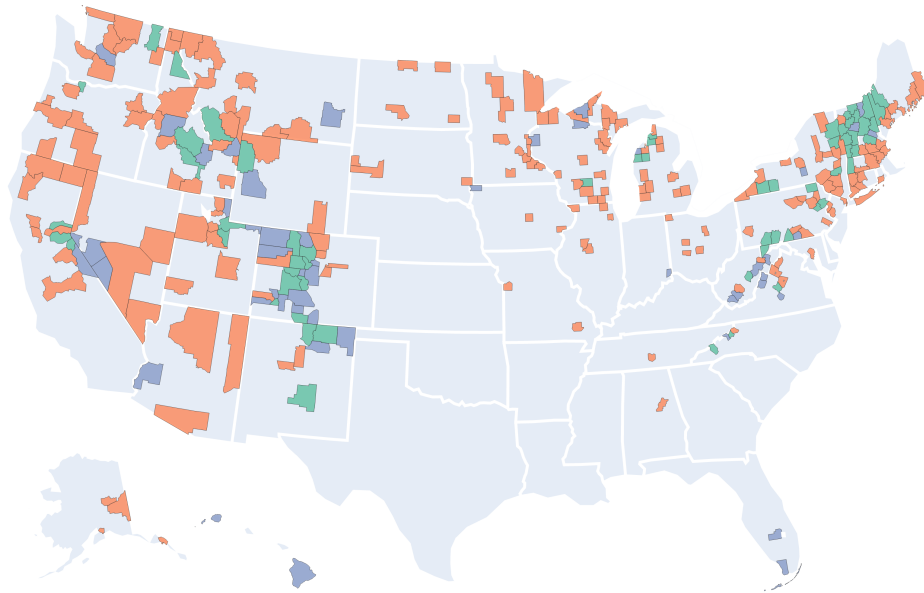

Supplement: supp [file elife-80466-supp-v1.zip › elife_poa_e80466_Figure_2_figure_supplement_4.pdf]

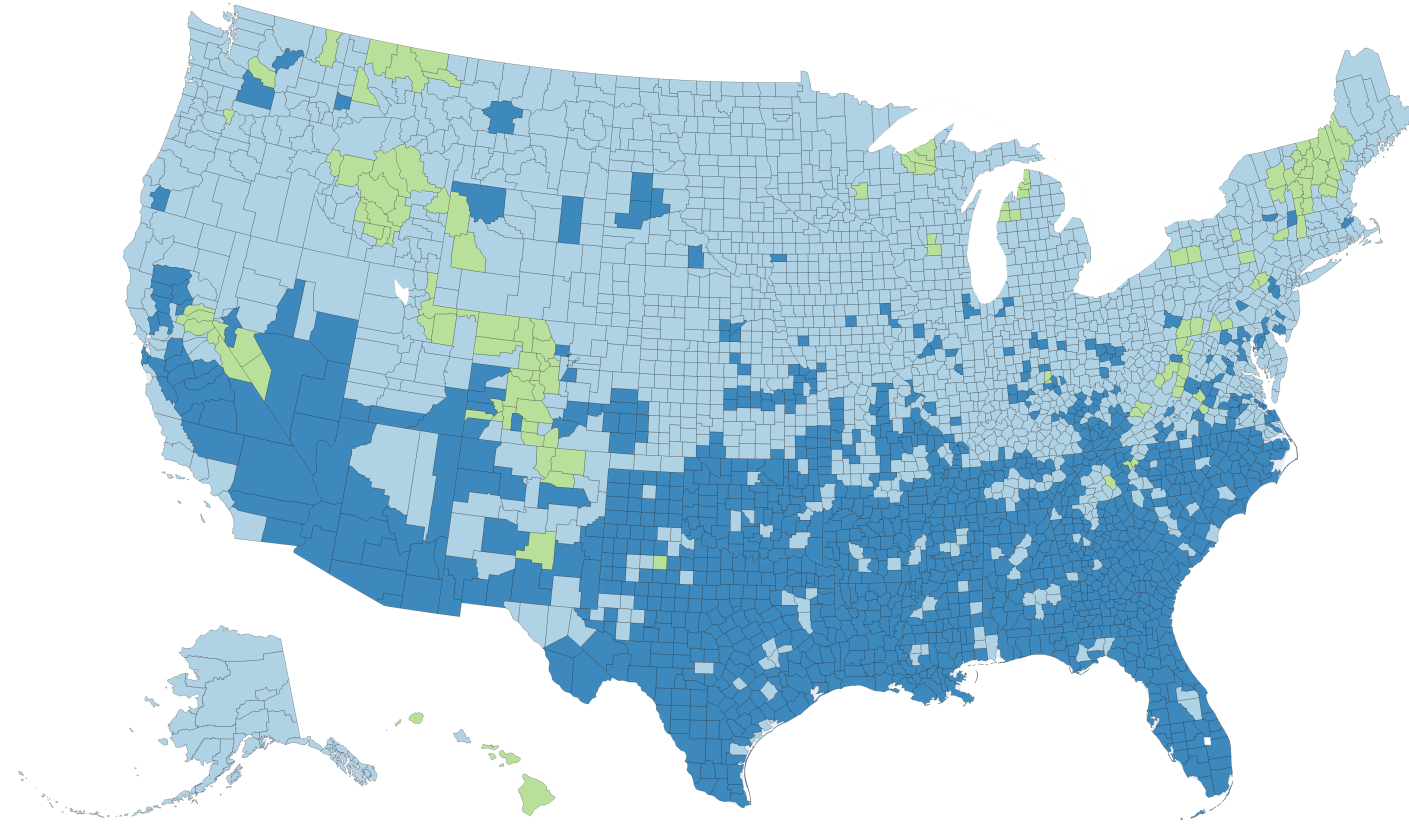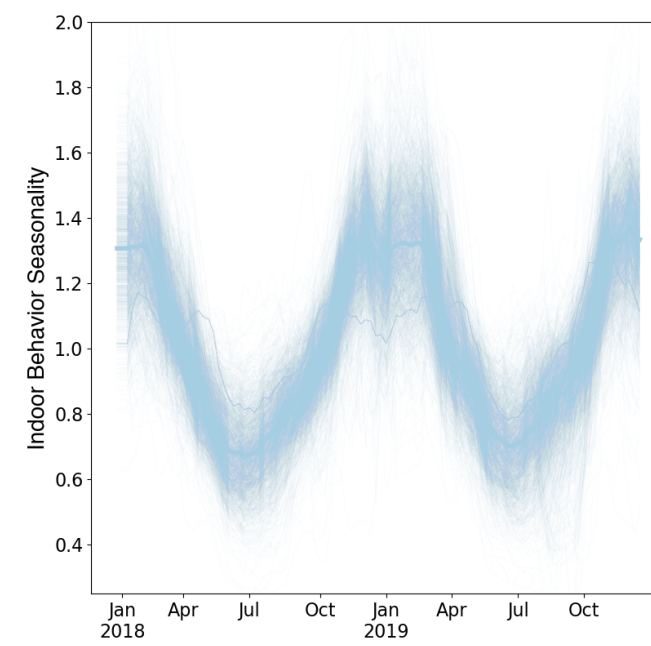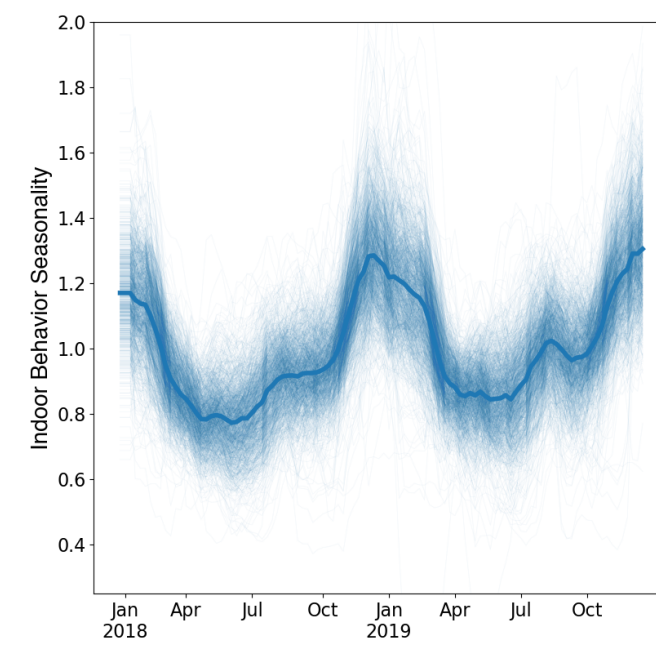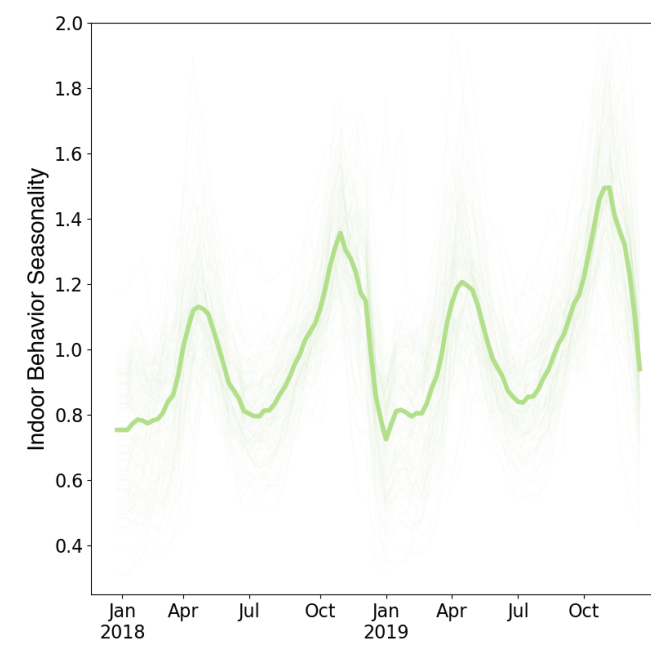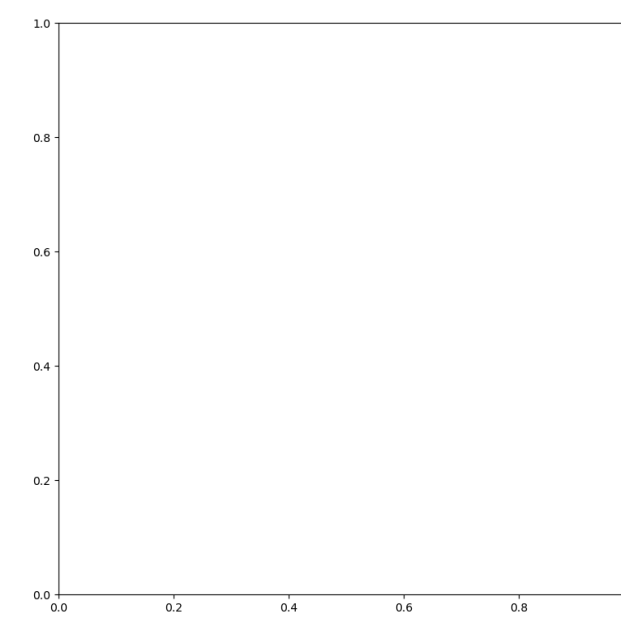

Supplement: supp [file elife-80466-supp-v1.zip › elife_poa_e80466_Figure_2_figure_supplement_5.pdf]

(A)

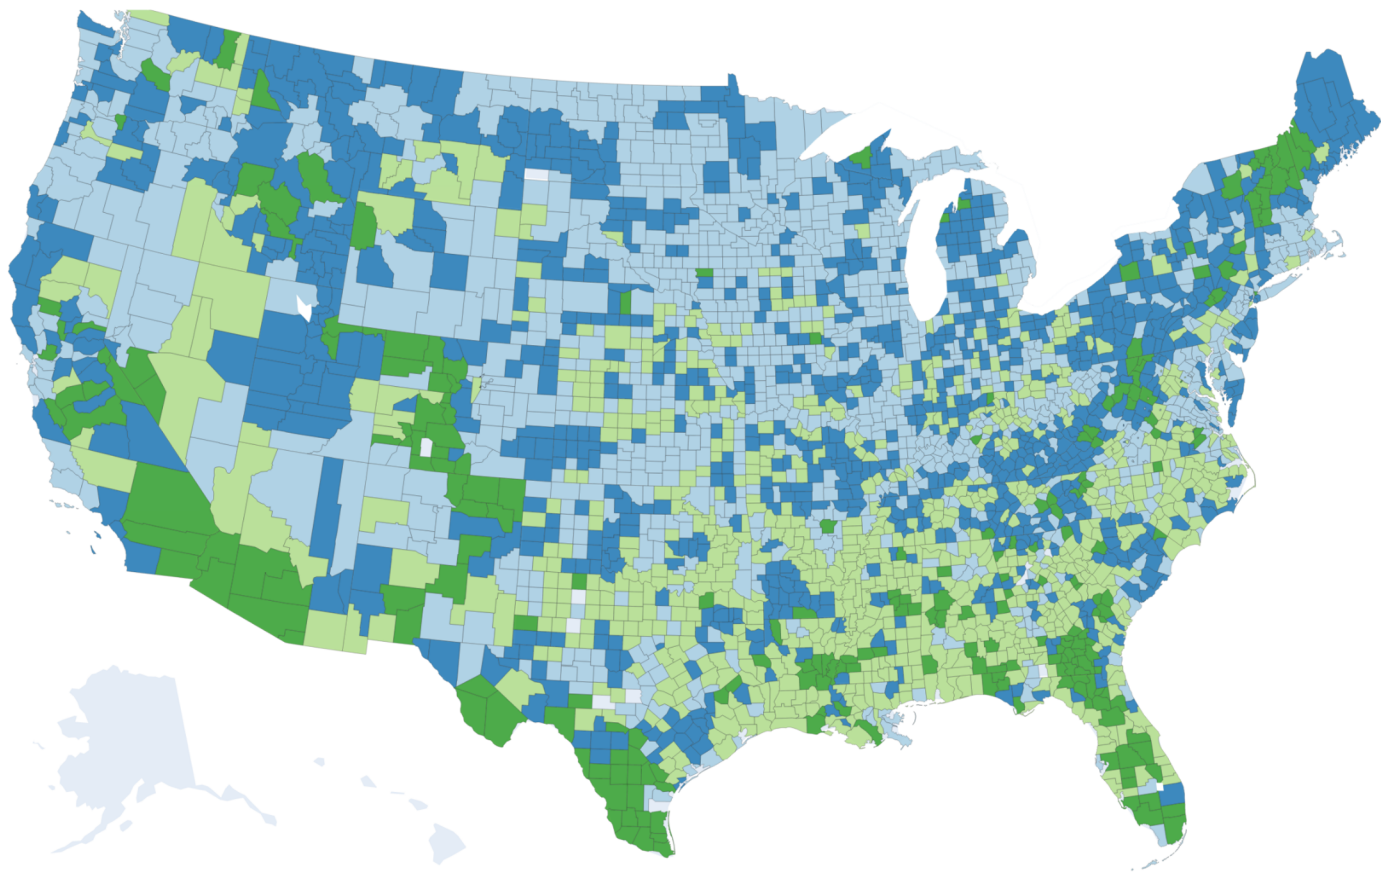

(B)

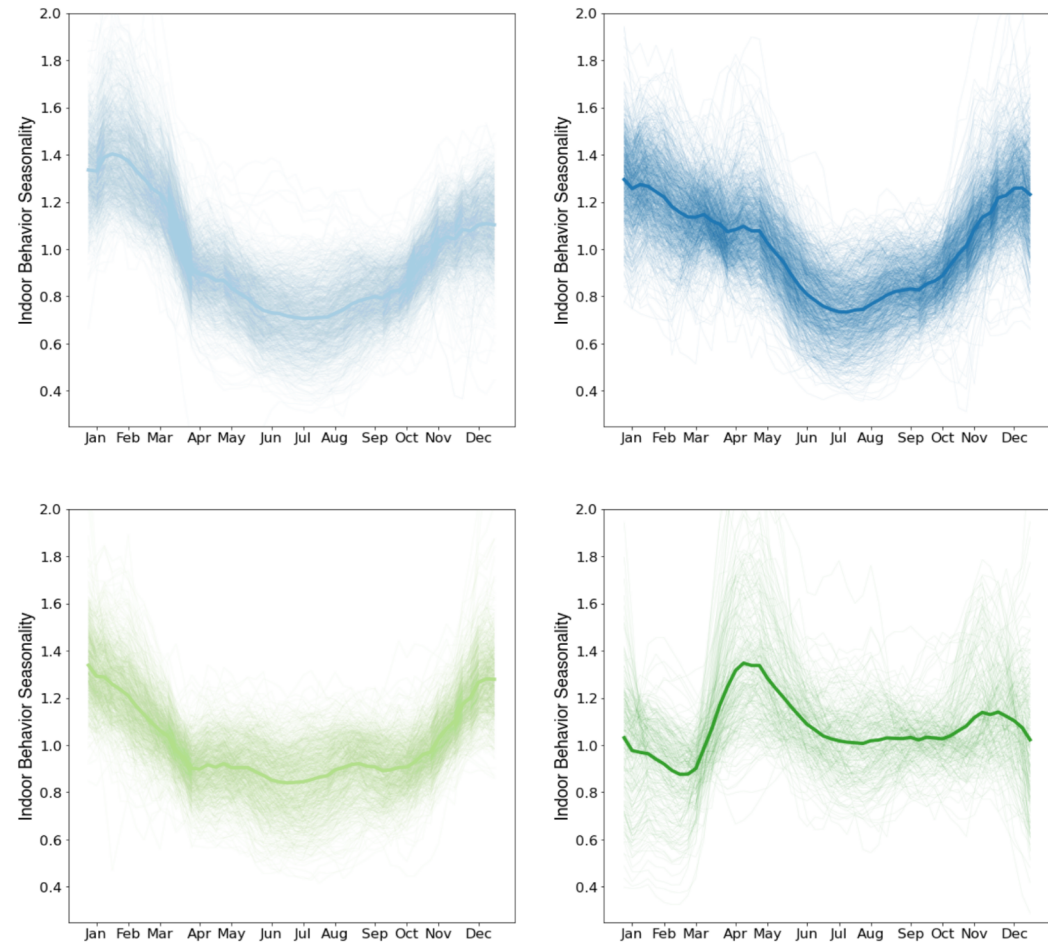

Supplement: supp [file elife-80466-supp-v1.zip › elife_poa_e80466_Figure_3_figure_supplement_2.pdf]

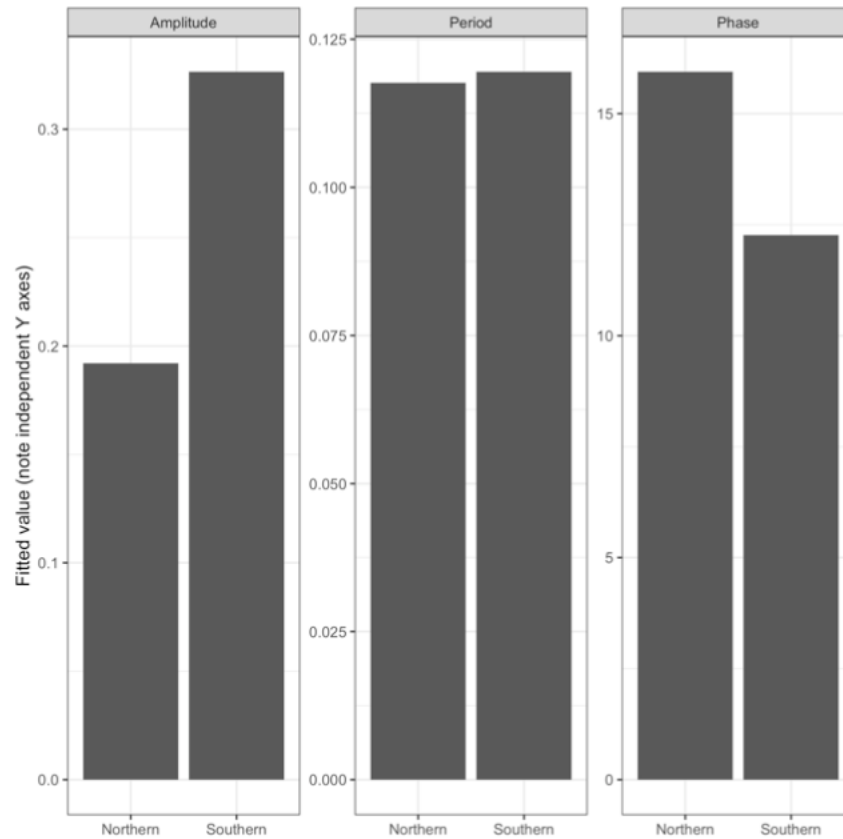

### Estimates and cluster differences

| term      | Northern   | Southern   | diff         |
|-----------|------------|------------|--------------|
| Amplitude | 0.1921964  | 0.3264692  | -0.134272737 |
| Period    | 0.1176322  | 0.1195019  | -0.001869687 |
| Phase     | 15.9414221 | 12.2645018 | 3.676920333  |

Supplement: supp [file elife-80466-supp-v1.zip › elife_poa_e80466_Figure_4_figure_supplement_1.pdf]

Mean RMSE of sine curve fit

0.25

0.20

0.15

0.10

2018-01

2018-07

2019-01

2019-07

2020-01

Northern

Southern

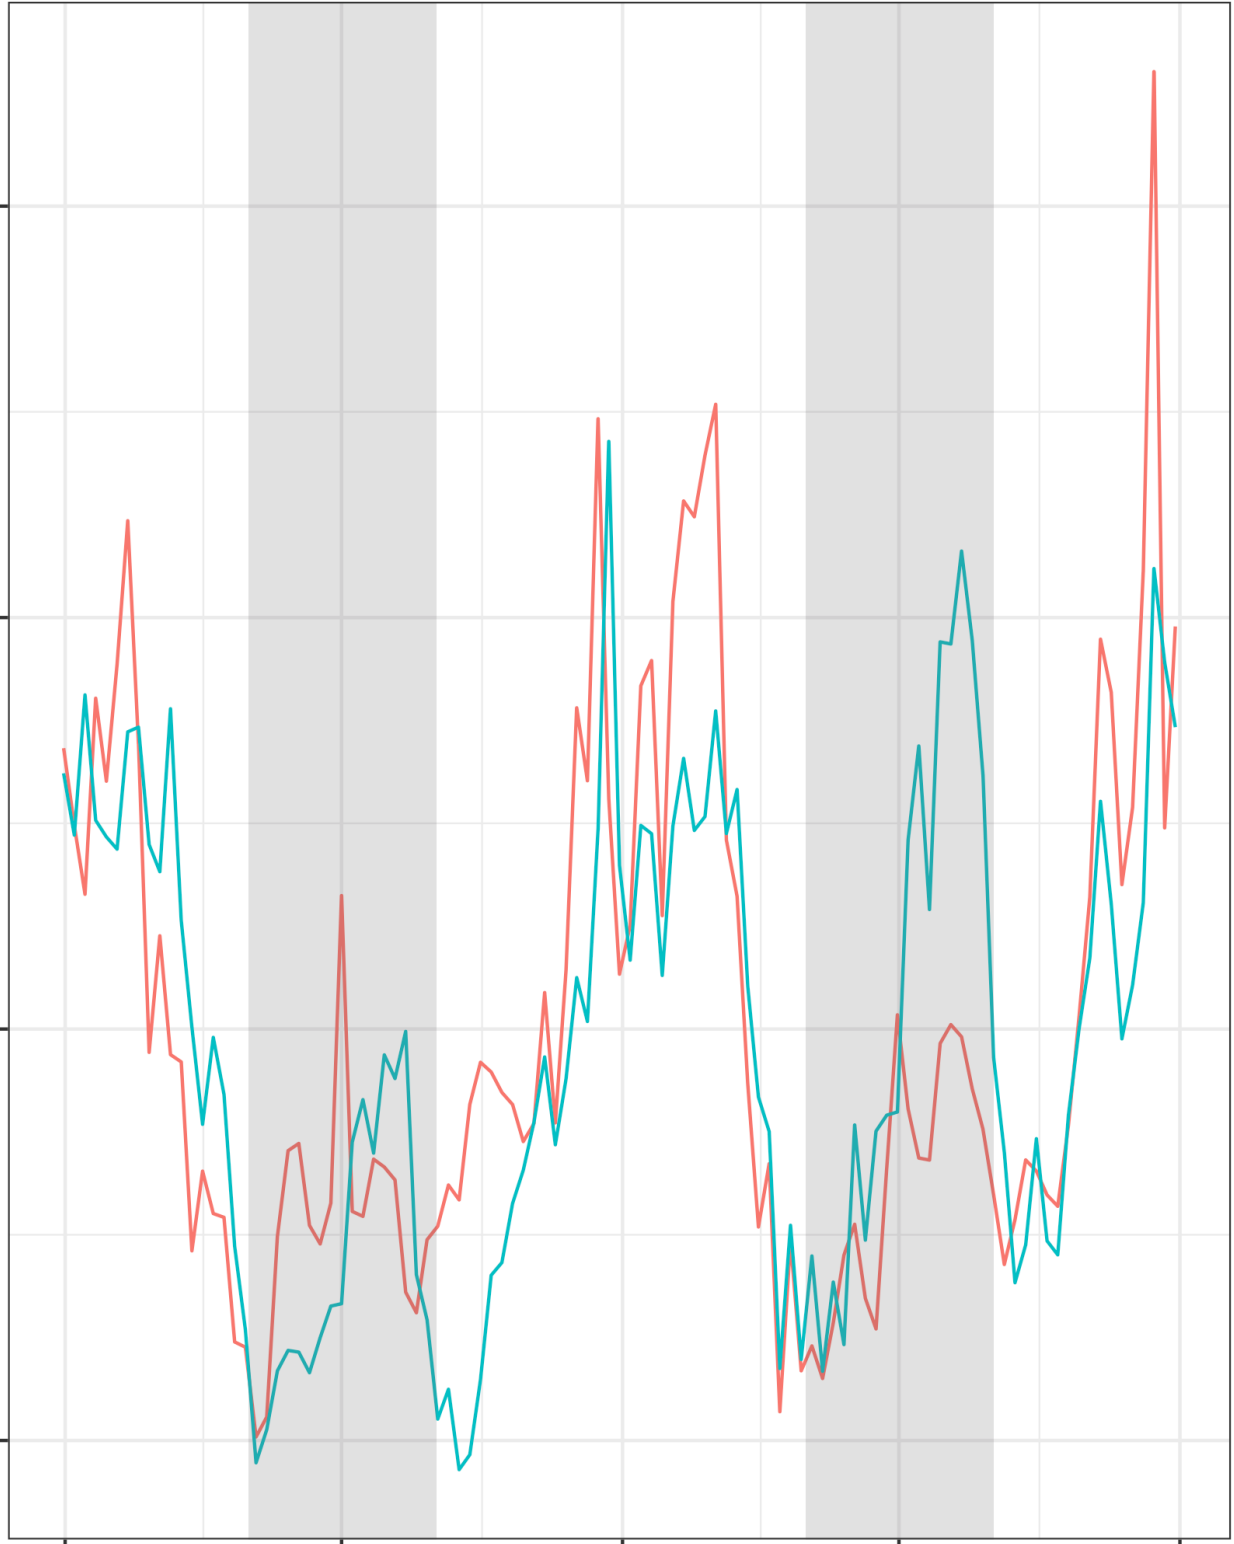

Supplement: supp [file elife-80466-supp-v1.zip › elife_poa_e80466_Figure_4_figure_supplement_2.pdf]

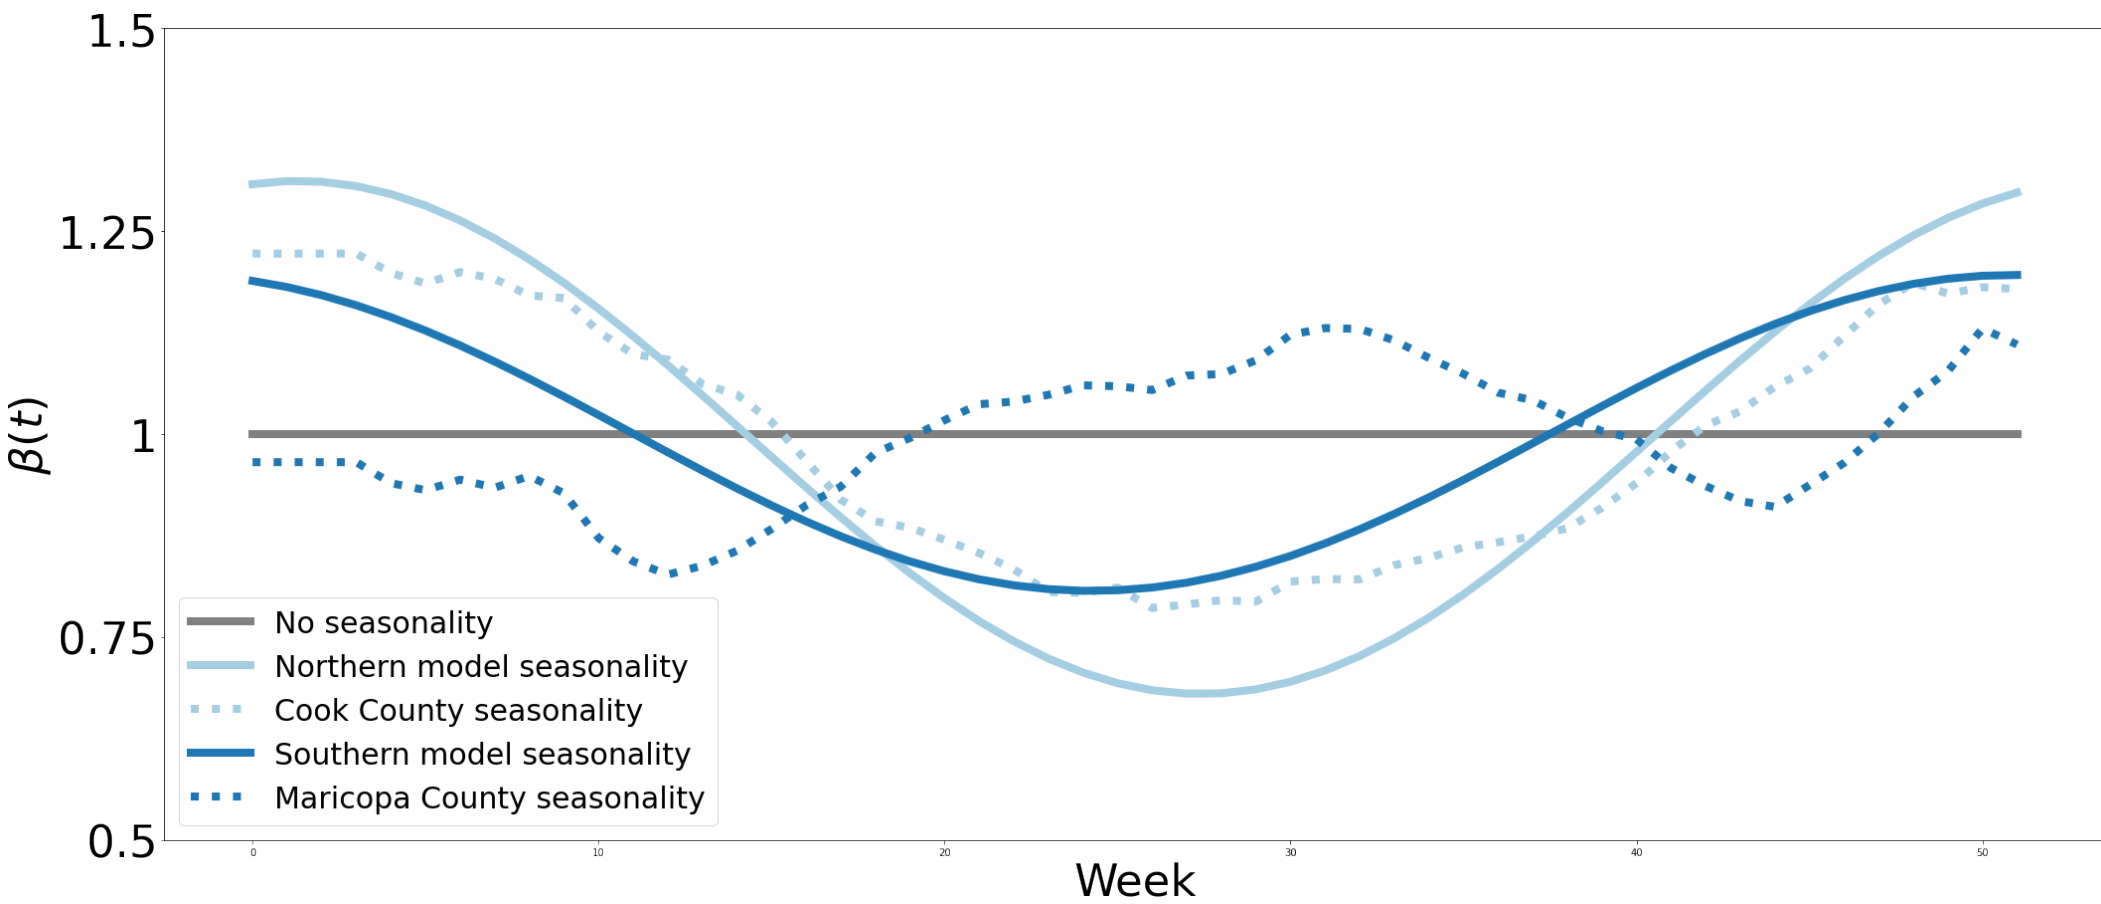

Supplement: supp [file elife-80466-supp-v1.zip › elife_poa_e80466_Figure_4_figure_supplement_3.pdf]
